# Supplementary material for: Modelling tower fatigue loads of a wind turbine using data miningtechniques on SCADA data
Source: Copernicus journal article supplement (doi:10.5194/wes-2019-30), 2020-01-02
Supplement: Supplementary file [file wes-2019-30-AC1-supplement.pdf]

Dear Referees,

the authors would like to express their gratitude for the time and effort spend in reviewing our paper.  
In the attached .pdf document, the response to the referees comments # 1 and # 2 will be given.

5

Yours sincerely,

On behalve of all the authors,

10 Marcel Schedat

Enclosures:

- Response to referee comments # 1 (page 2 to 15)
- 15 • Response to referee comments # 2 (page 16 to 20)

## **Response to referee comments # 1**

Dear anonymous referee # 1,

Thank you very much for your feedback to improve our manuscript!

5 In this document, the authors' responses are added in *cursive*.

As indicated in the contribution, the work presented in this paper originates from the Master's Thesis of the first author. Based on this contribution, this seems to be very good work for a Master's Thesis. In my opinion however, the quality should be improved for this paper. More in particular, especially the presentation quality. Nevertheless, the work presented is interesting and valuable.

10

Throughout the comments that follow, I indicated the most important (and thus necessary to tackle) ones by (\*).

General comments

15

(\*) In general, my main concern is the lack of shown results. Without more information, it is hard to review the results and conclusions drawn. I'll give specific examples later on. A general rule of thumb could be: whenever a conclusion is drawn based on own results, it can only be checked if the results themselves are shown. So all main conclusions drawn in the paper should be preceded by the results shown in a figure or table.

Some other general comments:

20

- The title states that "data mining techniques" (plural) are used to model fatigue loads. However, only neural networks are used. I'd consider to use "neural networks" instead of "data mining techniques". If you want to express the comparison of multiple techniques, an adjustment of the title might be considered towards feature selection (since this is not reflected in the title at this point). In my opinion, this is not strictly necessary.

25

*The title was changed to "Feature selection techniques for modelling tower fatigue loads of a wind turbine with neural networks"*

- Although mentioned in the abstract, the sensitivity analysis regarding the length of the data set (and the motivation for it) is not mentioned in the introduction.

30

*Sensitivity analysis was changed to a particular reduced set of continues data.*

Specific comments

35

- P.1 line 19-20: it's not clear to me what you mean by "more conservative models regarding the number of features"

*With the neighborhood component analysis the number of features was reduced while maintaining the interpretability of the features used. This would not be the case of e.g. Principal Component Analysis.*

40

*The sentence was changed.*

- P.1 abstract: consider including quantitative results (e.g. errors between measured and estimated DEL do not exceed x%)

45

*Quite a lot results were produced for different features and operational modes. We have added absolute mean squared error for the artificial neural network model using neighborhood component analysis and the full load operational mode.*

- (\*) P.4 line 9-10: Some more information on the turbine would be appreciated, in particular rated power.

50

*This paper seeks to model tower fatigue loads of a commercial wind turbine with a rated power of 2.05 MW, a hub height of 100 m and a rotor diameter of 92.5 m in the northern part of Germany. The turbine is used by the Wind Energy Technology Institute at the Flensburg University of Applied Sciences for research purposes.*

*The text has been changed and added.*

- (\*) P.5 line 1: More information about the measurement setup is needed. E.g. Are the measurements corrected for wall temperature before calculating bending moments? Is it possible to show the resulting (normalized) bending moments? E.g. vs time (for a smaller period) and vs windspeed

5 *For this study, the readings from the SCADA and a load measurement system in the previously mentioned turbine were recorded over around 11 months and collected in 10 min files. The tower bottom bending are measured by strain gauges. These were installed and wired as full bridge (Wheatstone) with temperature compensation. A Wheatstone bridge is widely used in strain gauge applications because of its ability to measure small deviations in resistance. The calibration factors were determined from the results of the shunt-resistor-calibration, tower geometry and the thickness of the tower wall at the strain gauge positions (provided by the turbine manufacturer). The Offsets are determined by means of a yaw round.*

10 *We have inserted a graph showing the DELs of the tower bending moments vs time (Figure 2).*

*The text has been changed and added.*

- P.5 line 9-11: the number used as  $n_{eq}$  is usually given too

15 *The short-term damage equivalent loads for every 10 min time series were calculated. The reference number of cycles within the lifetime of 20 years were assumed to be  $10^7$  cycles. The short damage equivalent load by 600 s equates to  $n_{eq} = 9.5064$ . Alternatively, the number of load cycles corresponding to 1 Hz (1Hz DEL) could be possible, but this was not decisive for the focus of the paper.*

20 *The text has been added.*

- P.5 line 14-16: How are the outliers detected? What were the (normalized) limit values to detect them?

*The process of outlier detection in this study was not automated but done through visual inspection of the descriptive statistics calculated from the time series for each operational mode.*

*The text has been added.*

- P.5 line 19: Can you give some more explanation on the descriptive statistic “mode”?

25 *“Mode” is one of the seven descriptive statistics that we used. Mode is the most frequent value in a 10-min time series.*

- P.6 Figure 1: nice figure, does help to understand the methodology

30 *Thank you.*

- p.6 line 4: This seems to be a lot of missing SCADA data. Are all of the variables missing or is it mostly due to one variable?

35 *As described earlier in the text, measurement errors were removed. In our case this happened due to technical failure in the extraction of the SCADA and our measuring computer over approximately 2.5 months.*

- P.6 line 5: This sentence is a bit confusing. The filtering by operational modes is done for the feature selection and the sensitivity analysis, isn't it?

40 *Apologies, this is misleading. The filtering was done in general for this analysis, for the sensitivity analysis we used the operational mode of partial load since more data was available there.*

- (\*) P.6 line 6-8: should the mean value of ACpow be below or equal to 5kW for the datapoint to correspond to standstill? Or is it the minimum, maximum or another descriptive statistic?

45 *In this sense, standstill corresponds to 10 min mean “ACpow” readings below or equal to 5 kW (0.25 % of nominal power); partial load to readings higher than 5 kW and below or equal to 2000 kW (97.56 % of nominal power); and full load to readings above 2000 kW.*

*Further explanation has been added.*

- P.6 line 7-8: It is easier to interpret the limits as x% of rated power instead of x kW. Consider to change to relative values.  
*Percentage of nominal power was added (see “- (\*) P.6 line 6-8”)*

5

- P.7 line 7-8: The sentence “Correlation coefficients above 0.95 ...” deserves more explanation. Does this mean that if an explanatory feature correlates with more 0.95 to the bending moment it is considered as redundant? Or is this only the case for explanatory features among each other?

10

*Correlation above 0.5 between the features and damage equivalent loads was considered. Correlation among all features of a particular sensor above 0.95 was considered as a redundant sensor and therefore eliminated for further analysis.  
The text was changed.*

- P.7, line 12: more explanation about p-value and F-statistic would be appreciated.

15

*P-value is used as a probability measure to identify if a particular feature is significant for the outcome of the model. If a p-value is larger than 0.05 the null hypothesis is true and the feature is selected for further modelling.  
The text was added.*

- P.7 line 22-23 “the output is then predicted by applying a function”: What kind of function?

20

*The NCA is based on the k-NN algorithm, therefore the prediction is performed by the trained k-NN regression model.  
The text has been added.*

- P.7 line 27: how are the weights decided for this paper?

25

*The weights are usually (also in the paper) assigned randomly and then adjusted by solving a minimization problem (minimizing the prediction error).  
Further text has been added.*

- P.7 line 28: observations = features ? This is a bit confusing, since “observations” might also be used for different measurements (in time)

30

*The word was changed to “features”.*

- (\*) Section 3.1: a visualization or overview of the selected and disregarded features for each dataset and technique is missing. As a reader, it is impossible to know which features were selected by which technique for which dataset except for the (few) mentioned in the text. Only by showing these results, the drawn conclusions can be checked. Moreover, it’s easier to understand the conclusions if you can see the results yourself.

35

*We have prepared a detailed overview of the three topics, which strengthens the comprehensibility:*

- 1. Correlation Analysis by Operation Mode*
- 2. Stepwise Regression results from all operational modes*
- 3. Summary of NCA for different operation modes*

40

*We think the results are quite interesting but too much too add in the paper. We will therefore write these representations in the appendix A 1 to 3.*

45

*Appendix A 1 Correlation Analysis by operational modes  
Chosen values are highlighted in red for the correlation analysis.*

| <i>Feature</i>         | <i>Still Stand</i> | <i>Partial Load</i> | <i>Full Load</i> | <i>All Modes</i> |
|------------------------|--------------------|---------------------|------------------|------------------|
| <i>acc_x_max</i>       | 0.92               | 0.92                | 0.88             | 0.96             |
| <i>acc_x_mean</i>      | 0.91               | 0.93                | 0.96             | 0.96             |
| <i>acc_x_range</i>     | 0.92               | 0.92                | 0.88             | 0.96             |
| <i>acc_x_mode</i>      | 0.53               | 0.08                | 0.25             | 0.19             |
| <i>acc_x_std</i>       | 0.93               | 0.94                | 0.97             | 0.97             |
| <i>acc_x_var</i>       | 0.77               | 0.85                | 0.94             | 0.86             |
| <i>acc_y_min</i>       | 0.04               | 0.04                | 0.03             | -0.08            |
| <i>acc_y_max</i>       | 0.81               | 0.90                | 0.82             | 0.86             |
| <i>acc_y_mean</i>      | 0.80               | 0.88                | 0.81             | 0.85             |
| <i>acc_y_range</i>     | 0.81               | 0.90                | 0.82             | 0.86             |
| <i>acc_y_mode</i>      | 0.35               | 0.14                | 0.00             | 0.06             |
| <i>acc_y_std</i>       | 0.80               | 0.90                | 0.83             | 0.85             |
| <i>acc_y_var</i>       | 0.70               | 0.77                | 0.82             | 0.75             |
| <i>v_wind_min</i>      | 0.65               | 0.53                | 0.59             | 0.64             |
| <i>v_wind_max</i>      | 0.76               | 0.90                | 0.87             | 0.80             |
| <i>v_wind_mean</i>     | 0.74               | 0.83                | 0.84             | 0.74             |
| <i>v_wind_range</i>    | 0.75               | 0.92                | 0.77             | 0.79             |
| <i>v_wind_mode</i>     | 0.72               | 0.80                | 0.78             | 0.71             |
| <i>v_wind_std</i>      | 0.73               | 0.94                | 0.81             | 0.77             |
| <i>v_wind_var</i>      | 0.70               | 0.90                | 0.77             | 0.71             |
| <i>v_dir_min</i>       | 0.12               | 0.08                | 0.12             | 0.16             |
| <i>v_dir_max</i>       | -0.13              | -0.05               | 0.12             | -0.16            |
| <i>v_dir_mean</i>      | -0.02              | 0.05                | 0.03             | 0.00             |
| <i>v_dir_range</i>     | -0.15              | -0.07               | 0.01             | -0.19            |
| <i>v_dir_mode</i>      | 0.02               | 0.00                | 0.00             | -0.01            |
| <i>v_dir_std</i>       | -0.15              | 0.07                | 0.11             | -0.11            |
| <i>v_dir_var</i>       | -0.11              | 0.04                | 0.10             | -0.08            |
| <i>omega_gen_min</i>   | -0.08              | 0.55                | -0.79            | 0.64             |
| <i>omega_gen_max</i>   | 0.19               | 0.80                | 0.81             | 0.68             |
| <i>omega_gen_mean</i>  | 0.04               | 0.71                | 0.08             | 0.67             |
| <i>omega_gen_range</i> | 0.38               | 0.37                | 0.88             | 0.28             |
| <i>omega_gen_mode</i>  | 0.02               | 0.65                | -0.05            | 0.66             |
| <i>omega_gen_std</i>   | 0.33               | 0.29                | 0.94             | 0.19             |
| <i>omega_gen_var</i>   | 0.30               | 0.22                | 0.93             | 0.13             |

| <i>Feature</i>           | <i>Still Stand</i> | <i>Partial Load</i> | <i>Full Load</i> | <i>All Modes</i> |
|--------------------------|--------------------|---------------------|------------------|------------------|
| <i>air_density_min</i>   | -0.10              | 0.22                | 0.05             | 0.23             |
| <i>air_density_max</i>   | -0.11              | 0.22                | 0.06             | 0.23             |
| <i>air_density_mean</i>  | -0.10              | 0.22                | 0.05             | 0.23             |
| <i>air_density_range</i> | -0.02              | 0.01                | 0.08             | -0.07            |
| <i>air_density_mode</i>  | -0.10              | 0.22                | 0.05             | 0.23             |
| <i>air_density_std</i>   | -0.02              | 0.00                | 0.09             | -0.07            |
| <i>air_density_var</i>   | -0.02              | 0.02                | 0.07             | -0.03            |
| <i>pitch_min</i>         | 0.27               | 0.03                | 0.71             | -0.35            |
| <i>pitch_max</i>         | 0.41               | 0.31                | 0.87             | -0.25            |
| <i>pitch_mean</i>        | 0.35               | 0.21                | 0.81             | -0.31            |
| <i>pitch_range</i>       | 0.30               | 0.31                | 0.55             | 0.37             |
| <i>pitch_mode</i>        | 0.36               | 0.12                | 0.66             | -0.32            |
| <i>pitch_std</i>         | 0.30               | 0.24                | 0.32             | 0.25             |
| <i>pitch_var</i>         | 0.26               | 0.15                | 0.28             | 0.09             |
| <i>ACpow_min</i>         | -0.15              | 0.64                | -0.05            | 0.82             |
| <i>ACpow_max</i>         | 0.20               | 0.89                | 0.83             | 0.89             |
| <i>ACpow_mean</i>        | 0.04               | 0.81                | 0.29             | 0.88             |
| <i>ACpow_range</i>       | 0.21               | 0.92                | 0.17             | 0.70             |
| <i>ACpow_mode</i>        | 0.00               | 0.75                | -0.15            | 0.85             |
| <i>ACpow_std</i>         | 0.21               | 0.88                | -0.07            | 0.59             |
| <i>ACpow_var</i>         | 0.20               | 0.70                | -0.12            | 0.45             |

*Appendix A 2 Stepwise Regression results for different operation modes  
Chosen values are marked with an “x”.*

| <i>Feature</i>         | <i>Still Stand</i> | <i>Partial Load</i> | <i>Full Load</i> | <i>All Modes</i> |
|------------------------|--------------------|---------------------|------------------|------------------|
| <i>acc_x_min</i>       |                    | <i>x</i>            |                  | <i>x</i>         |
| <i>acc_x_max</i>       | <i>x</i>           | <i>x</i>            | <i>x</i>         | <i>x</i>         |
| <i>acc_x_mean</i>      | <i>x</i>           | <i>x</i>            | <i>x</i>         | <i>x</i>         |
| <i>acc_x_range</i>     |                    |                     |                  |                  |
| <i>acc_x_mode</i>      | <i>x</i>           | <i>x</i>            | <i>x</i>         | <i>x</i>         |
| <i>acc_x_std</i>       | <i>x</i>           | <i>x</i>            | <i>x</i>         | <i>x</i>         |
| <i>acc_x_var</i>       | <i>x</i>           | <i>x</i>            | <i>x</i>         | <i>x</i>         |
| <i>acc_y_min</i>       |                    |                     |                  |                  |
| <i>acc_y_max</i>       | <i>x</i>           |                     |                  | <i>x</i>         |
| <i>acc_y_mean</i>      | <i>x</i>           | <i>x</i>            | <i>x</i>         | <i>x</i>         |
| <i>acc_y_range</i>     | <i>x</i>           |                     |                  |                  |
| <i>acc_y_mode</i>      |                    |                     | <i>x</i>         |                  |
| <i>acc_y_std</i>       |                    | <i>x</i>            |                  |                  |
| <i>acc_y_var</i>       | <i>x</i>           | <i>x</i>            |                  | <i>x</i>         |
| <i>v_wind_min</i>      |                    | <i>x</i>            | <i>x</i>         | <i>x</i>         |
| <i>v_wind_max</i>      |                    |                     |                  |                  |
| <i>v_wind_mean</i>     | <i>x</i>           | <i>x</i>            | <i>x</i>         | <i>x</i>         |
| <i>v_wind_range</i>    |                    | <i>x</i>            |                  |                  |
| <i>v_wind_mode</i>     | <i>x</i>           |                     | <i>x</i>         | <i>x</i>         |
| <i>v_wind_std</i>      | <i>x</i>           | <i>x</i>            |                  | <i>x</i>         |
| <i>v_wind_var</i>      | <i>x</i>           | <i>x</i>            | <i>x</i>         |                  |
| <i>v_dir_min</i>       | <i>x</i>           |                     |                  |                  |
| <i>v_dir_max</i>       | <i>x</i>           | <i>x</i>            |                  |                  |
| <i>v_dir_mean</i>      | <i>x</i>           | <i>x</i>            |                  | <i>x</i>         |
| <i>v_dir_range</i>     |                    |                     |                  | <i>x</i>         |
| <i>v_dir_mode</i>      |                    |                     |                  |                  |
| <i>v_dir_std</i>       | <i>x</i>           | <i>x</i>            | <i>x</i>         | <i>x</i>         |
| <i>v_dir_var</i>       | <i>x</i>           | <i>x</i>            |                  | <i>x</i>         |
| <i>omega_gen_min</i>   | <i>x</i>           | <i>x</i>            | <i>x</i>         |                  |
| <i>omega_gen_max</i>   |                    | <i>x</i>            |                  |                  |
| <i>omega_gen_mean</i>  | <i>x</i>           | <i>x</i>            |                  |                  |
| <i>omega_gen_range</i> | <i>x</i>           |                     |                  |                  |
| <i>omega_gen_mode</i>  | <i>x</i>           | <i>x</i>            |                  | <i>x</i>         |
| <i>omega_gen_std</i>   | <i>x</i>           |                     | <i>x</i>         | <i>x</i>         |
| <i>omega_gen_var</i>   | <i>x</i>           | <i>x</i>            | <i>x</i>         | <i>x</i>         |

| <i>Feature</i>           | <i>Still Stand</i> | <i>Partial Load</i> | <i>Full Load</i> | <i>All Modes</i> |
|--------------------------|--------------------|---------------------|------------------|------------------|
| <i>air_density_min</i>   |                    |                     | <i>x</i>         |                  |
| <i>air_density_max</i>   |                    |                     |                  |                  |
| <i>air_density_mean</i>  |                    |                     |                  |                  |
| <i>air_density_range</i> | <i>x</i>           |                     |                  |                  |
| <i>air_density_mode</i>  |                    |                     | <i>x</i>         |                  |
| <i>air_density_std</i>   | <i>x</i>           | <i>x</i>            |                  | <i>x</i>         |
| <i>air_density_var</i>   | <i>x</i>           | <i>x</i>            |                  |                  |
| <i>pitch_min</i>         | <i>x</i>           | <i>x</i>            | <i>x</i>         | <i>x</i>         |
| <i>pitch_max</i>         |                    | <i>x</i>            |                  | <i>x</i>         |
| <i>pitch_mean</i>        |                    | <i>x</i>            | <i>x</i>         | <i>x</i>         |
| <i>pitch_range</i>       |                    |                     |                  |                  |
| <i>pitch_mode</i>        | <i>x</i>           | <i>x</i>            | <i>x</i>         | <i>x</i>         |
| <i>pitch_std</i>         |                    | <i>x</i>            | <i>x</i>         | <i>x</i>         |
| <i>pitch_var</i>         | <i>x</i>           | <i>x</i>            |                  | <i>x</i>         |
| <i>ACpow_min</i>         |                    | <i>x</i>            |                  | <i>x</i>         |
| <i>ACpow_max</i>         | <i>x</i>           | <i>x</i>            | <i>x</i>         | <i>x</i>         |
| <i>ACpow_mean</i>        | <i>x</i>           | <i>x</i>            | <i>x</i>         | <i>x</i>         |
| <i>ACpow_range</i>       |                    |                     |                  |                  |
| <i>ACpow_mode</i>        | <i>x</i>           | <i>x</i>            |                  | <i>x</i>         |
| <i>ACpow_std</i>         | <i>x</i>           | <i>x</i>            |                  | <i>x</i>         |
| <i>ACpow_var</i>         | <i>x</i>           | <i>x</i>            |                  | <i>x</i>         |



*Appendix A 3 Summary of NCA for different operation modes  
Chosen values are marked with a "x".*

| <i>Feature</i>       | <i>Still Stand</i> | <i>Partial Load</i> | <i>Full Load</i> | <i>All Modes</i> |
|----------------------|--------------------|---------------------|------------------|------------------|
| <i>omega_min</i>     |                    |                     |                  |                  |
| <i>omega_max</i>     |                    |                     |                  |                  |
| <i>omega_mean</i>    |                    |                     |                  |                  |
| <i>omega_range</i>   |                    |                     |                  |                  |
| <i>omega_mode</i>    |                    |                     |                  |                  |
| <i>omega_std</i>     |                    |                     |                  |                  |
| <i>omega_var</i>     |                    |                     |                  |                  |
| <i>acc_x_min</i>     |                    |                     |                  |                  |
| <i>acc_x_max</i>     | x                  |                     |                  |                  |
| <i>acc_x_mean</i>    | x                  | x                   | x                | x                |
| <i>acc_x_range</i>   | x                  |                     |                  |                  |
| <i>acc_x_mode</i>    |                    |                     |                  |                  |
| <i>acc_x_std</i>     | x                  | x                   | x                | x                |
| <i>acc_x_var</i>     |                    |                     |                  |                  |
| <i>acc_y_min</i>     |                    |                     |                  |                  |
| <i>acc_y_max</i>     | x                  |                     |                  | x                |
| <i>acc_y_mean</i>    |                    |                     |                  |                  |
| <i>acc_y_range</i>   | x                  |                     |                  | x                |
| <i>acc_y_mode</i>    |                    |                     |                  |                  |
| <i>acc_y_std</i>     | x                  |                     |                  |                  |
| <i>acc_y_var</i>     |                    |                     |                  |                  |
| <i>v_wind_min</i>    |                    |                     |                  |                  |
| <i>v_wind_max</i>    | x                  |                     |                  |                  |
| <i>v_wind_mean</i>   |                    | x                   |                  | x                |
| <i>v_wind_range</i>  |                    |                     |                  |                  |
| <i>v_wind_mode</i>   |                    |                     |                  |                  |
| <i>v_wind_std</i>    |                    | x                   |                  | x                |
| <i>v_wind_var</i>    |                    |                     |                  | x                |
| <i>v_dir_min</i>     |                    |                     |                  |                  |
| <i>v_dir_max</i>     |                    |                     |                  |                  |
| <i>v_dir_mean</i>    | x                  |                     |                  | x                |
| <i>v_dir_range</i>   |                    |                     |                  | x                |
| <i>v_dir_mode</i>    | x                  |                     |                  |                  |
| <i>v_dir_std</i>     | x                  | x                   |                  |                  |
| <i>v_dir_var</i>     |                    |                     |                  |                  |
| <i>omega_gen_min</i> | x                  |                     |                  |                  |
| <i>omega_gen_max</i> | x                  | x                   |                  |                  |

| <i>Feature</i>           | <i>Still Stand</i> | <i>Partial Load</i> | <i>Full Load</i> | <i>All Modes</i> |
|--------------------------|--------------------|---------------------|------------------|------------------|
| <i>omega_gen_mean</i>    |                    |                     |                  |                  |
| <i>omega_gen_range</i>   | x                  | x                   |                  | x                |
| <i>omega_gen_mode</i>    |                    |                     |                  |                  |
| <i>omega_gen_std</i>     |                    |                     | x                |                  |
| <i>omega_gen_var</i>     |                    |                     |                  |                  |
| <i>air_density_min</i>   |                    |                     | x                |                  |
| <i>air_density_max</i>   |                    |                     |                  |                  |
| <i>air_density_mean</i>  |                    |                     |                  |                  |
| <i>air_density_range</i> |                    |                     |                  |                  |
| <i>air_density_mode</i>  |                    |                     |                  |                  |
| <i>air_density_std</i>   |                    |                     |                  |                  |
| <i>air_density_var</i>   |                    |                     |                  |                  |
| <i>pitch_min</i>         |                    |                     | x                |                  |
| <i>pitch_max</i>         |                    |                     |                  |                  |
| <i>pitch_mean</i>        |                    |                     | x                |                  |
| <i>pitch_range</i>       |                    | x                   |                  |                  |
| <i>pitch_mode</i>        |                    |                     |                  |                  |
| <i>pitch_std</i>         |                    |                     | x                |                  |
| <i>pitch_var</i>         |                    |                     |                  |                  |
| <i>ACpow_min</i>         |                    | x                   |                  |                  |
| <i>ACpow_max</i>         |                    |                     |                  |                  |
| <i>ACpow_mean</i>        |                    | x                   |                  | x                |
| <i>ACpow_range</i>       | x                  | x                   |                  | x                |
| <i>ACpow_mode</i>        |                    |                     |                  |                  |
| <i>ACpow_std</i>         | x                  |                     | x                | x                |
| <i>ACpow_var</i>         |                    |                     |                  |                  |

- P.9 line 19: a figure showing results about the collinearity would be helpful for this discussion

*All results of the correlating analysis were attached in the appendix A 1.*

5

- P.9 line 22-23 “Many of the remaining variables ... model”: an example with specific resulting values would be helpful

*Same answer as for “P.9 line 19”*

- P.10 line 6: How does stepwise regression avoid multicollinearity?

10

*Stepwise regression does not avoid collinearity directly. In Stepwise regression features are added to the regression model one by one. If a feature added results in a better model (meaning that the prediction accuracy is better) then the feature is kept. Generally, a feature which is collinear with others would not improve the accuracy of a model and there it is dropped by the stepwise regression.*

*In order to avoid misunderstandings, we have removed this sentence.*

- P.11 Section 3.1.2: Discussion about PCA seems to be missing

*For each operational mode PCA was performed to account for potential collinearity in the feature-set. This was done consistently with an explained variance of 99 % remaining.*

*The text has been added.*

- (\*) P.12 Section 3.2.1: I like the idea to first give more precise results for one neural network model before comparing all of them. However, more information and results should be given. Which were the final features used for this one model? How did the training, testing and validation data look like (for example plot of the measured normalized power curve for all three datasets, can be based on mean statistics)? Plots of the measured and predicted DEL vs mean windspeed, errors vs mean windspeed for example.

*We have rebuilt the entire paragraph to give a better understanding on how precise the results (predicted DELs) in comparison to the measured DELs are. For example, in Figure 5 you can see predicted and the calculated (measured) DELs over a number of 10 min time series and the corresponding prediction error. Furthermore, Figure 6 gives the reader an impression of the behaviour prediction error vs wind speed.*

- P.12 Section 3.2.1: some of the information and results given seem irrelevant for this discussion. E.g. at which epoch the training stopped. Consider to omit this from the paper or to include it in the discussion to show the added value

*We agree with your comment.*

*We removed this part and rebuilt the entire paragraph.*

- P.12 Figure 3: Personally, I don't think this plot adds value to the paper. If not needed for main conclusions, consider to remove it.

*We agree and have therefore removed it.*

- P.12 line 11-13: these datapoints (outliers) are not visible in the figure. Maybe consider a different visualization

*We removed the figure.*

- P.12 line 10-11 and p.13 Figure 4: Personally I don't see the added value of this figure and discussion.

*We removed this part and rebuilt the entire paragraph.*

- (\*) P.12 line 12 and further: didn't you exclude outliers from your dataset? Did you take a closer look to the time signals of bending moment and different SCADA parameters to check what is causing these high errors?

*The mean error in percent is calculated as follow:*

$$\text{mean error} = \frac{(\text{calculated DEL} - \text{predicted DEL})}{\text{calculated DEL}} * 100$$

*High prediction errors are expected when the DEL is low. For example, the calculated DEL is 30 kNm and the predicted is 150 Nm then we will have an error of -400 %. In terms of prediction error it is extremely high, but we are only 120 kNm off. If we are 120 kNm off in full load then this error can be less than 1 %.*

*We added an additional plot as suggested to see the high error occurring to low wind speed (Figure 6).*

- P.12 line 16: I cannot find the result 0.99486 in the figures or tables

*All models were run again based on better comparability with other studies and the comments made above.*

- P.14 Figure 5: It's not clear to which data sets the figures exactly correspond. Add sublabels please.

*Appendix A 1 to 3 was added for correlation, stepwise regression and NCA for different operational modes.*

*Additionally the whole chapter was rewritten.*

- Section 3.2.1: An additional conclusion could be made: From the introduction I understood Vera-Tudela and Kühn did a similar analysis with slightly different techniques. How do your results compare to theirs?

*Results were changed to “mean error in %” and “standard deviation of the error in %” to make it comparable to the results from Vera-Tudela. The complete analysis was redone therefor changes in numbers are possible.*

*A short comparison was added in Section 3.2.2. in the paper:*

*“The results from the full load model can be compared to existing work from Vera-Tudela and Kühn (2014) where the mean error is below 0.22 for all feature-sets. The maximum absolute error and standard deviation of the error also confirm the results. The accuracy of the results from the partial load model is slightly worse for all features-sets.”*

*Additional sentence added in the conclusions: “It can be concluded that the performance of NN is influenced by the operational mode that the WT. The highest accuracy was achieved when the WT was operating in full load and the lowest in stand still.”*

- P.14 Section 3.2.2: Additional figures might be helpful here too. For example, measured and predicted (by the different models) DEL vs mean windspeed, where a different color is used for each model/operational mode.

*We added all relevant information on Figure 5 and 6. For all operational modes the calculated DELs vs. predicted DELs highlights the accuracy of the model and the improvement as the WT operates.*

- P.14 Figure 6: if you want to show DELs are lower for standstill than during full load, it is much easier to plot them on the same graph. Moreover, are the results shown here all test data? Why don't you show all test data instead of only 100 points for each operational mode?

*This was intended to highlight that values close to 0 can have a high error in %. The figure 6 was removed and replaced by an overview of the measured DEL vs predicted DEL (figure 5).*

- P.16, Section 3.3: What is the exact intention of this analysis? Is it to determine the minimum period needed to measure the bending moments? If that's the case, shouldn't the focus be on the dataset containing the least data? To make sure a good estimation is obtained for that operational mode too?

*We changed the section by using the first 50 % of the data available in partial load for training the ANN and tested it on to the remaining 50% of the data.*

- P.16 line 11: is the dataset increased consecutive in time or by randomly picking data from the entire dataset of one year?

*No, for the previous sensitivity analysis we also used always the first x percent of data consecutive.*

- Section 3.3: An additional conclusion could be made: From the introduction I understood Smolka and Cheng did a similar analysis. How do your results compare to theirs?

*In the study of Smolka and Cheng only the correlation analysis for selecting features was conducted. In our paper we compared different methods and we were able to reduce the features significantly with NCA. This paper conducted an additional analysis for the standstill mode where significant increase of mean error was identified.*

- (\*) p.17 line 11-12: The first part of this conclusion is not clear to me. What do you mean with “conservative model regarding the number of features”? The second part doesn't seem to be true. Looking at Tables 2 and 3, the lowest mean errors are rarely found for NCA.

*The results indicate that using all data and applying neighborhood component analysis for feature selection yields an interpretable and low dimensional feature-set while maintaining high accuracy.*

*The text has been changed.*

- P.18 line 6-10: If the purpose is to eliminate the need for installing strain gauges on every turbine, it seems it is especially necessary the model is validated on a different turbine. Training the model with data from multiple turbines might not be necessary.

5        *To be able to generalize the results obtained from this study, the NN model requires validation with data collected from a different wind turbines with the same specifications.  
The text has been changed.*

- (\*) P.18 line 12: Why would you want to train the neural network with larger datasets? Wasn't one of your conclusions that you didn't need as much data to have a model equally accurate?

10        *This is referred to the other operational mode such as stand still and full load. We had limited data there that is why we used partial load to test the model on 50% of the data.  
The text has been changed.*

15        Technical corrections

The comments hereafter are not critical and are meant to improve the readability of the paper.

20        - p.1 line 12-15: very long sentence, consider to split it up  
*done*

- p.3 line 1-9: different lengths of datasets were used for the different analyses shown in this paper. The summary written here seems to suggest 2,5 months of data was used to model the thrust loads. However, only 2 weeks were used to train the model and (in case of operational data) one year was used to validate. On the other hand, 2,5 months of data was used to perform a Pearson correlation analysis.

25        *corrected*

- P.3 line 26-32: If I understood it correctly, your work is actually similar to the work of Seifert et al, except you have done it for tower bending moments, while Seifert et al. did it for blade root bending moments.

30        *Our focus was to identify the required feature for build such a model and how or of these effects the accuracy. This was performed by several feature selection techniques. We could conclude, that NCA was able to identify the most relevant features without linear transformation by i.e. PCA while maintaining a high accuracy of the model.*

35        - P.6 line 4: in my opinion, 6044 hours is not easier to interpret than 36266 observations of 10 minutes. I think "a little over 8 months" would be better. Similarly in the conclusion (p.18 line 3-5)

*done*

- P.6 line 4: Considered to add also the percentage of remaining data after the removal of missing data.

40

- P.8 line 7: typo "squared"

*done*

- P.9 line 25: It might be helpful to clearly state that from this point the second technique, PCA, is discussed.

45

*done*

- P.10, Figure 2: add a line at 99% to increase visibility

*You can see the relevant point in Figure 3 (Figure 2 was changed).*

- P.11 line 8: typo “datasets is the again the”

*corrected*

5

- P.13 line 5: sentence can be missed very easily

*The paragraph was completely rewritten.*

- P.14 line 10: reference to results is missing

10

*has been added*

- P.16 line 14: an equivalent number in time (weeks, months) is easier to interpret than 10241 observations

*The paragraph was completely rewritten and the comments were noted.*

15

## Response to referee comments #2

Dear anonymous referee # 2,

We thank you for providing valuable comments to improve our manuscript.

5 In this document, the authors' responses are added in *cursive*.

Received and published: 10 February 2020

10 The paper deals with the estimation of damage equivalent tower bending moments from SCADA data using a neural network approach. In particular it focuses on methods for feature selection to determine which of the available parameters has to be included as input to the network. The work is interesting and worth publication in general. However, improvements are necessary. The paper should also be revised carefully to improve the presentation quality.

### General comments

15 The title implies that several data mining techniques for modeling tower fatigue loads are compared. However, it seems that the main work focuses on feature reduction techniques. In my opinion the title should be adjusted to better reflect the content of the paper.

20 A comprehensive literature survey has been undertaken to investigate state of research related to the estimation of loads from SCADA data. However, the paper also focuses on methods for feature reduction. Are there studies outside of wind energy which compare feature reduction methods? If so, how do the results compare to those presented in this paper?

### Specific comments

25 p.1, l.18-20: What is meant by "conservative" models?

*This expression was disadvantageous and was therefore changed to "The Neighborhood component analysis yields the minimum number of features required while maintaining the interpretability with an absolute mean squared error of around 2 % for full load."*

*In this way, the word "conservative" meant a low dimensional feature-set.*

30 p.1, l.22: What do you mean with "deployment"? It may not be the correct word. How does that relate to the competition?

*The expression has been replaced by "due to the rapid growth of the wind energy installed capacity".*

p.2,l.7: Could you please explain why load measurement systems are required for this purpose? The structural condition is usually monitored with accelerometers.

35 *For us, the focus was on determining the bending moments on a tubular steel tower of a wind turbine. A continuous measurements and recording of the strain (in this case by strain gauges) were important for this. The acceleration sensors on the tower used in commercial systems are primarily used for vibration monitoring (mostly in the area of the tower head). If a defined limit value is reached, a warning or alarm follows with a corresponding reaction of the control unit (e.g. shutdown). The continuous decoupling of signals from these acceleration sensors was not readily*  
40 *available to us at the time of the measurement campaign.*

p.4,Table 1: From the rest of the paper it seems that the dependent variables for the modeling are the fore-aft bending moment and not strains (see p.5, l.11). Please clarify.

45 *The tower bending moments are calculated by the measured strains with the help of strain gauges (Chapter 2.1 refers to this calculation of the moments)*

p.5, l.2: Please explain what you mean by "short-term" equivalent load?

50 *The short-term DEL is based on a 10 min time series without extrapolation to its lifetime. In our case we used for 10 min  $n_{eq} = 9.5064$ , which is equivalent to  $10^7$  cycles in 20 years. Alternatively, the number of load cycles corresponding to 1 Hz (1Hz DEL) could be possible, but this was not decisive for the focus of the paper.*



*The information has been added to the text.*

p.5, l.2: Please explain what you mean by "short-term" equivalent load?

*Repetition of the question before.*

5

p.5, l.11: Why  $m=3$ ?

*We determined the DELs on a tubular steel tower. For clarity, we have chosen only one inverse slope  $m = 3$  for steel ( $m = 4$  or  $5$  are common, too).*

10 p.7: It is nice that the four approaches are explained briefly. However, it should also be discussed how the approaches compare with respect to feature reduction. What are their limitations or advantages? Maybe the methods can also be compared using a table which may be easier to follow for the reader?

*The results of the methods are now attached to the appendix A 1 to 3 (page 5 to 10 at this document). The reader can see which features were selected for correlation analysis, stepwise regression and NCA.*

15 p.8, l.8: How does the validation subset generalize the transfer function? And what is meant by "transfer function" anyhow? Is that the network itself?

*The transfer function is part of the ANN. The weights are adjusted and later a weighted sum is passed through the activation function. The validation set is used to "test" the prediction. If the prediction has a bad accuracy but the training data performs well it is overfitted and the weights are readjusted. The expression "transfer function" is changed to "prediction model".*

20

p.8, l.13: The choice for the NN architecture should be based on some rational and not on a default suggestion by a software. Why do you think that the chosen NN architecture is reasonable? Can you give another justification than that this is the default setting of a software?

*There is no rule on how to choose the hyperparameters for a black box model like ANN. They can be chosen by default or randomly and later adjusted based on the performance of the ANN. In this case there was no need to adjust the parameters as the model performed well. We tried varying the parameters (which is not part of the paper and requires a separate analysis) and got similar results. It could be possible to investigate on the number of hidden layers required to achieve certain results or the learning rates which would be a separate analysis.*

25

30 p.8, l.15: See comment above.

*Please see answer above. Our focus was not on optimizing the architecture, which is why we kept the default setting.*

p.9, l.14: The DELs are calculated for the bending moments and not for the thrust.

*Right, the DELs are calculated for the fore-aft moments of the wind turbine tower.*

35

*We changed the text.*

p.9, l.15: What do you mean by "facing the wind"? Are measurement with large yaw errors included in the dataset? And how can the wind not affect the thrust load?

*In this investigation, we neglected a potential yaw angle error on the system and only calculated the tower bending moment in the fore-aft direction at the base in alignment with the nacelle. The investigation of the influence of inclined wind flows, e.g. due to yaw errors, were not part of this work and is currently under further investigation.*

40

*The sentence in text has been deleted.*

p.9, l.23ff: Is PCA not applied? Or does the rest of the page refer to PCA?

*The page refers to 11 months of data used to analyse. One of the feature selection techniques is the correlation analysis, where on top PCA is applied for dimensionality reduction.*

45

*We added this information to the text.*

p.10,l.19-21: The paper is justified in Chapter 1 by the fact that NCA was not investigated in other studies so far. It is therefore a bit disappointing, that there are only two sentences related to this method in this section, especially considering that results from the other approaches are described in much greater detail.

5 *NCA is described on p. 26 (this document) as a feature selection technique. The technique itself is no particularly novel there for a brief introduction seemed appropriate. We added a complete table on the feature selection techniques and their results. The results from NCA can be found in appendix A 3.*

p.11,l.17: Isn't it more a change in wind speed that has an effect on rotor speed and tower kinematics alike? Do you mean with this sentence that rotor speed and tower deflections are correlated?

10 *The wind speed influences the rotational speed and the rotational speed is correlated with the DEL. If there is no rotation at the wind turbine we still have a changing DEL due to the wind speed and therefore the wind speed is higher correlated with the DEL then only the rotational speed.*

*Here you can see our correlations (appendix A 1):*

- 15
  - correlation of mean wind speed ( $v_{wind\_mean}$ ) with DEL: 0.74
  - correlation of rotational speed ( $\omega_{gen\_mean}$ ) with DEL: 0.67

*They do not exclude each other but complement.*

p.11,l.22-25: This is surprising. Was it investigated in detail? If there is no correlation, the stepwise regression should not select this feature. Is there an error in the stepwise regression approach or is there another explanation for the pitch angle?

20 *If the stepwise regression does not select a particular feature, this does not mean that it is not important or correlated. If a feature does not improve the prediction accuracy it will not be selected by stepwise regression. This can happen when another feature is already selected in a model which provides similar information. In this way multicollinearity is avoided.*

25 p.11: Was PCA not applied?

*PCA was applied and this information was added to the text.*

p.14, l.16ff: It is not shown in Figure 6 that DELs during standstill are lower as the DELs are normalized. Is there another way to illustrate it?

30 *This chapter has been completely revised in large parts and the new illustrations provide an improved overview.*

p.16, l.1: What do you mean by good practice? It seems that feature-selection has no impact on the results. This is contradicting to the research by Sharma and Saroha (p.6) which states that feature-selection should result in more accurate results. Could you please discuss?

35 *Features selection method helped to reduce the amount of information needed to build a particular model. Feature selection reduces the needed information building a particular model since some of the features do not provide any sufficient information to model the DEL. This ultimately leads to a reduced amount of sensors required modelling the DEL (Appendix A1 to 3 added for the feature selection results on correlation analysis, stepwise regression and NCA).*

40 p.16, table 3: It seems that feature selection has not impact on the estimation results from the NN. Can this indicate that there are still too many features? Usually, each method can be varied by changing some parameters. Have you conducted a parameter study to investigate, if more strict settings for feature selection would result in even smaller feature sets without losing accuracy?

45 *This indicates that the feature selection techniques chose the features which has sufficient information to later construct such a model. Investigating the parameters for each feature selection technique is unfortunately not in the scope of this study. It could be possible to reduce the features even further and maintaining the same accuracy, this would need further investigation.*

50 p.16, l.13f: Please discuss how this result can be used to reduce time and costs for data collection in practice. To my understanding the 40% of the data was randomly selected out of 1 year of measurements. That means that is still requires to

measure for one year. To me, one year of measurements sounds reasonable to cover all operational conditions, seasonal variations, etc. I cannot see how that can be reduced really. If still 1 year of measurement is required the purpose of this study remains unclear. Please give a justification why this study was undertaken and why results should be presented in this paper.

5 *We changed the sensitivity study to a particular data set (50% of partial load). This were not chosen randomly, they refer to the first 50% of the data. We use the model to predict "future" DELs and investigate how well the model performs. This would mean that collecting around 3 month of data to calculate the DEL would be sufficient to predict it for the next 3 month (for partial load).*

10 p.17,l.11f: I cannot see from table 3 that a NN based on NCA is superior in terms of accuracy. In the abstract it is also mentioned that all NN result in similar accuracy. See also p.15, l. 5ff

*It is superior in term of least number of features required while keeping the interpretability of the features. This section was completely rewritten.*

Technical comments

15

p.1, l.17: "with the partial load model"  
*corrected*

20

p.1, l.25: "failures for example"  
*corrected*

p.1, l.29: Are there two spaces "of WTs"?  
*corrected*

25

p.1, l.29: "can potentially be"  
*corrected*

p.2, l.8: I don't think that "sophisticated" is the correct word. Maybe "challenging"?  
*corrected*

30

p.2, l.10: I don't think that "briefly visited" is the correct wording.  
*corrected*

p.2,l.17-34: This section contains quite general statements and also the motivation for performing fatigue load estimation. Why is it placed in the middle of the literature review? Should it be moved to the beginning of chapter 1?

35

*corrected*

p.3, l.34: I don't think that "scarce" is the correct wording.  
*corrected*

40

p.5, l.13: It is not the method for "development of the paper" which is shown.  
*corrected*

p.6, l.11: "most" instead of "more"?  
*corrected*

45

p.6, l.11: "For this purpose"?  
*corrected to: "For the learning process"*

- p.7, l.23: "differentiate" instead of "differ"?  
*corrected*
- 5 p.8, l.23: "sought"? What does that mean?  
*The Chapter has been revised. The word*
- p.8, l.23: "accurately" instead of "appropriately"?  
*corrected*
- 10 p.8, l.21-23: The same is written just a few lines above.  
*corrected*
- p.9, l.3-5: This sentence is hard to understand. Could you please formulate it in a different way?  
15 *Corrected to: "The results indicate that the accelerations in both directions (i.e. x and y-axis) are highly correlated with the DELs. The standard deviation of the acceleration in the x-direction presents the highest correlation with a coefficient of 0.97, depicting an almost linear relationship between this feature and the dependent variable."*
- p.12, l.15: "estimated DELs" instead of "trained DELs"?  
20 *Chapter has been revised*
- p.14, l.10: "It can be observed"  
*corrected*
